# Supplementary material for: Assessing approaches to determine the effect of ocean acidification onbacterial processes
Source: Copernicus journal article supplement (doi:10.5194/bg-13-4379-2016), 2016-08-08

Supplement of Biogeosciences, 13, 4379–4388, 2016  
<http://www.biogeosciences.net/13/4379/2016/>  
doi:10.5194/bg-13-4379-2016-supplement  
© Author(s) 2016. CC Attribution 3.0 License.

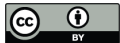

Biogeosciences  Open Access

*Supplement of*

## **Assessing approaches to determine the effect of ocean acidification on bacterial processes**

**Timothy J. Burrell et al.**

*Correspondence to:* Timothy J. Burrell ([timbo.burrell@gmail.com](mailto:timbo.burrell@gmail.com))

The copyright of individual parts of the supplement might differ from the CC-BY 3.0 licence.

## **Supplementary Material**

Supplementary figure legends

Supplementary figures S1-S6

## **Supplementary figure legends**

### **Table S1**

Average LAP activity buffered in 0.1 M Tris and MOPS at pH 8.1 in coastal seawater ( $n=3 \pm SE$ ).

### **Figure S2**

Change in pH<sub>t</sub> in each treatment during trial 1 ( $n=3 \pm SD$ ).

### **Figure S3**

Change in pH<sub>t</sub> in each treatment during trial 2 ( $n=3 \pm SD$ ).

### **Figure S4**

Cell specific AG activity (mean  $\pm$  SE,  $n=3$ ) in response to seawater acidified with 0.1 M HCl (A), bubbled with CO<sub>2</sub>-Air gas mixture (B) and CO<sub>2</sub>-Air gas mixture introduced through gas-permeable silicon tubing (P) in trial 1.

### **Figure S5**

Cell specific AAP activity (mean  $\pm$  SE,  $n=3$ ) in response to seawater acidified with 0.1 M HCl (A), bubbled with CO<sub>2</sub>-Air gas mixture (B) and CO<sub>2</sub>-Air gas mixture introduced through gas-permeable silicon tubing (P) in trial 1.

### **Figure S6**

Cell specific AAP activity (mean  $\pm$  SE,  $n=3$ ) in response to seawater acidified with 0.1 M HCl (A), bubbled with CO<sub>2</sub>-Air gas mixture (B) and CO<sub>2</sub>-Air gas mixture introduced through gas-permeable silicon tubing (P) in trial 2.

## Supplementary figures

**Table S1**

| Trial | Tris activity (nmol l <sup>-1</sup> h <sup>-1</sup> ) | MOPS activity (nmol l <sup>-1</sup> h <sup>-1</sup> ) |
|-------|-------------------------------------------------------|-------------------------------------------------------|
| 1     | 51.54 (±2.32)                                         | 43.42 (±1.43)                                         |
| 2     | 35.92 (±0.81)                                         | 29.34 (±1.08)                                         |

Figure S2

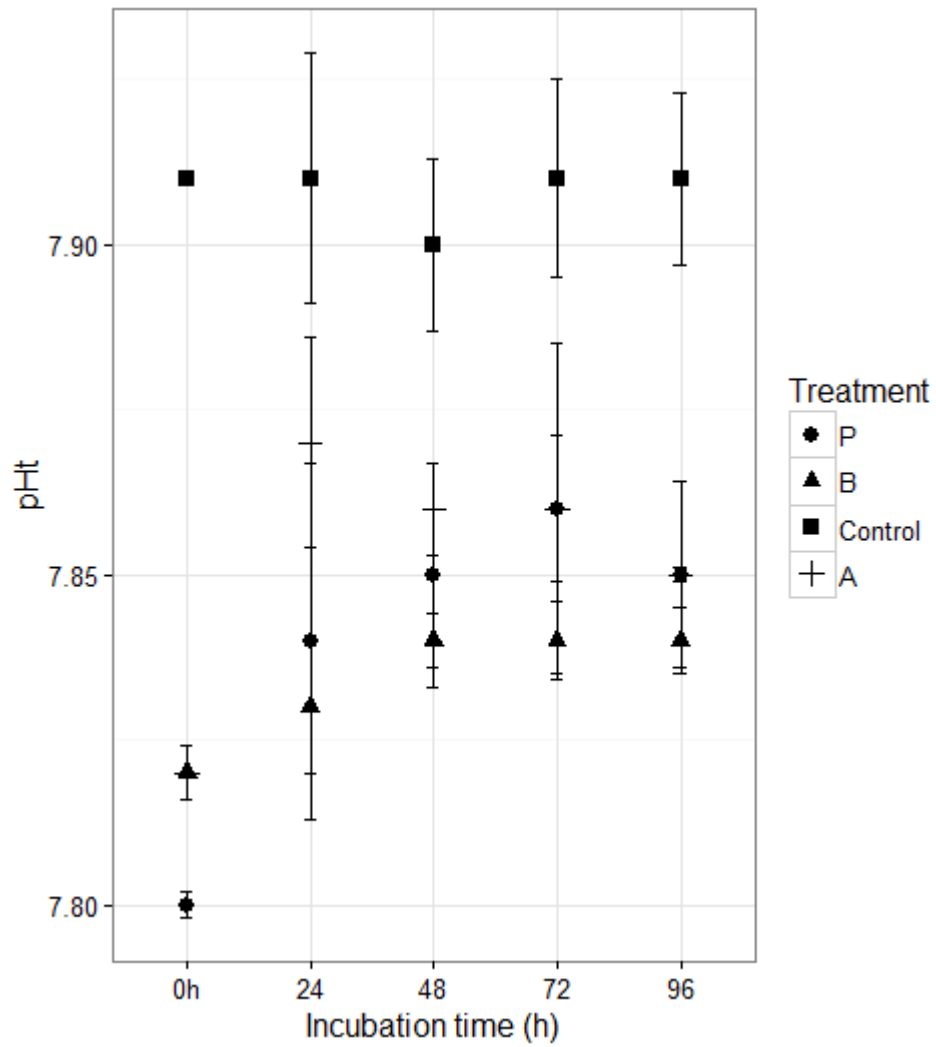

Figure S3

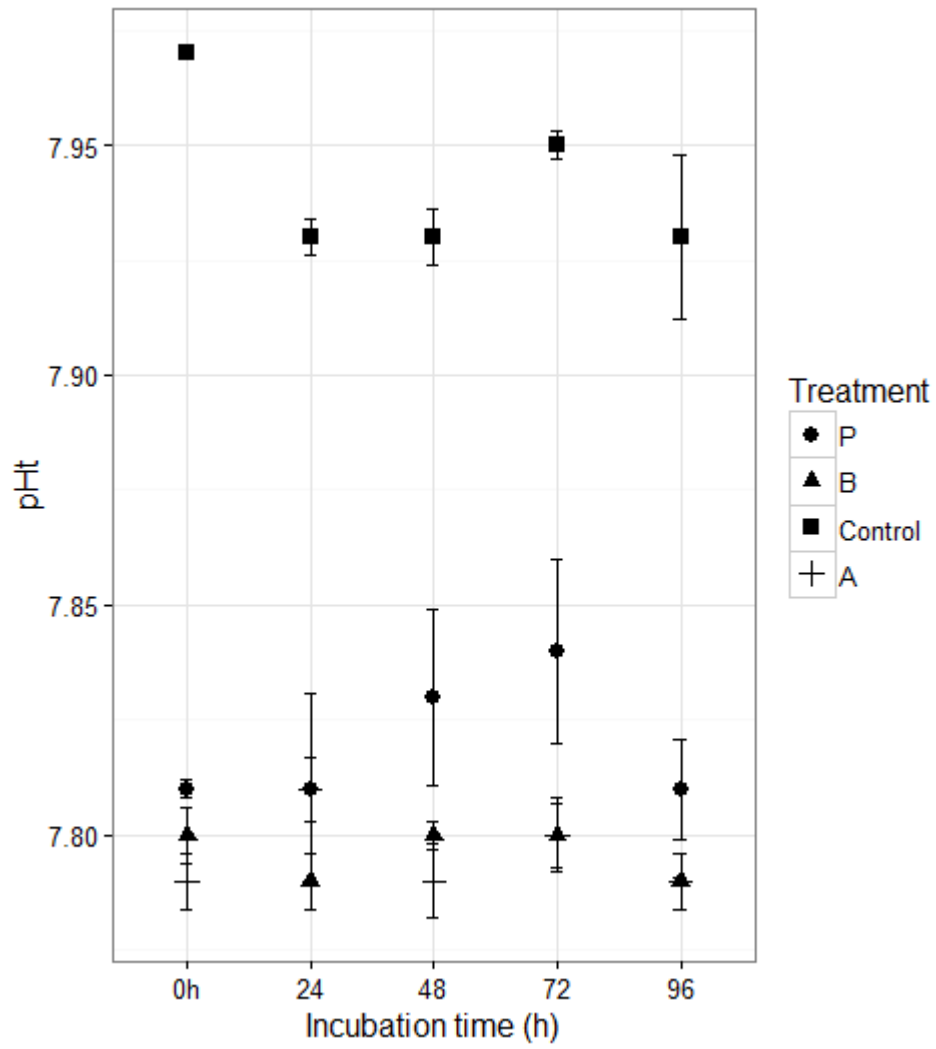

Figure S4

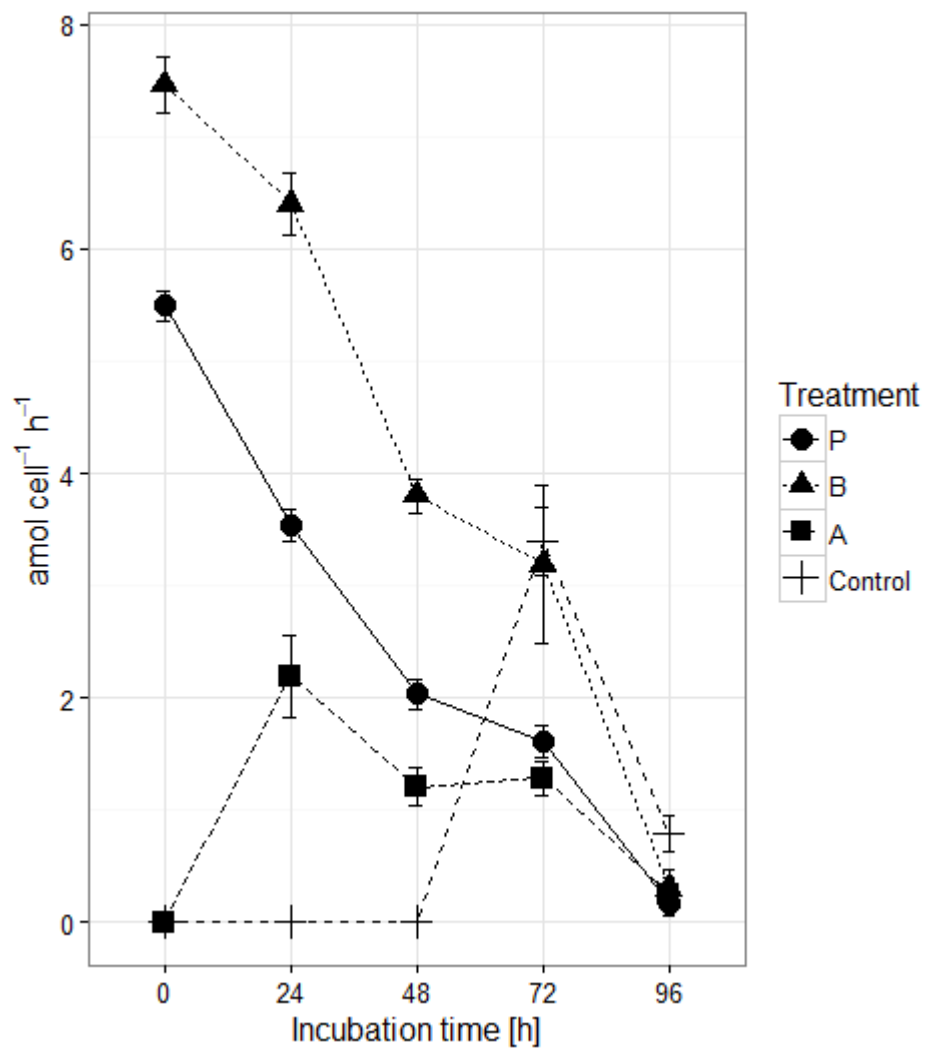

Figure S5

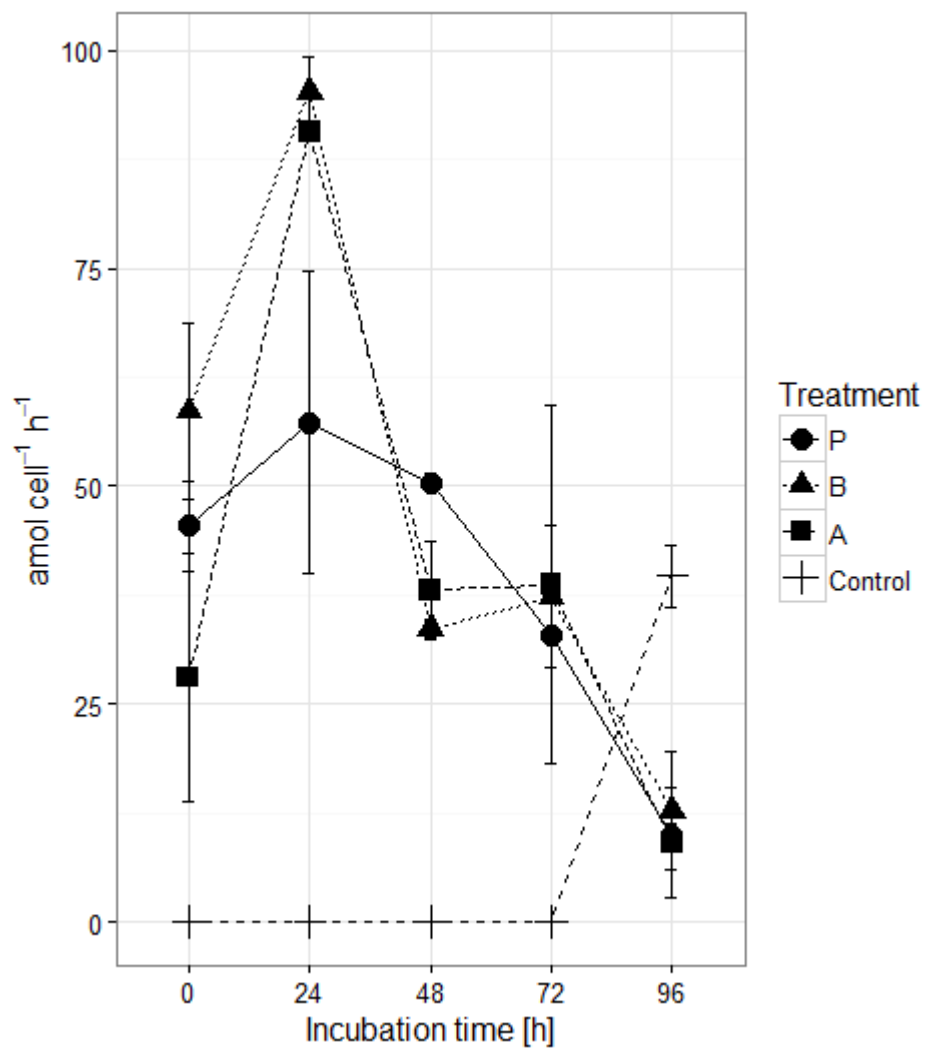



Figure S6

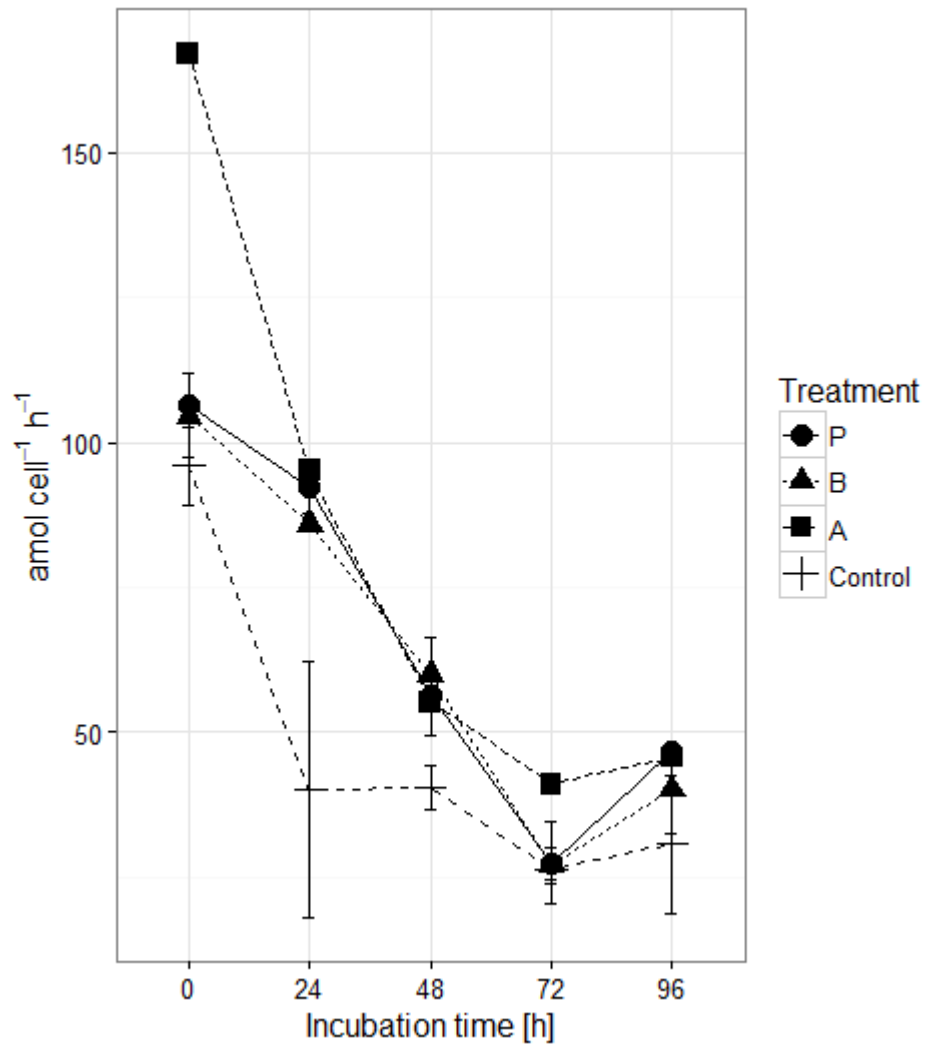

Supplement: Supplementary file 1 [file bg-13-4379-2016-supplement.pdf]
